# Supplementary material
Source: PubMed Central journal article supplement (PMC9248923)
Supplement: NIHMS1794232-supplement-Supplemental_Material.pdf [file NIHMS1794232-supplement-Supplemental_Material.pdf]

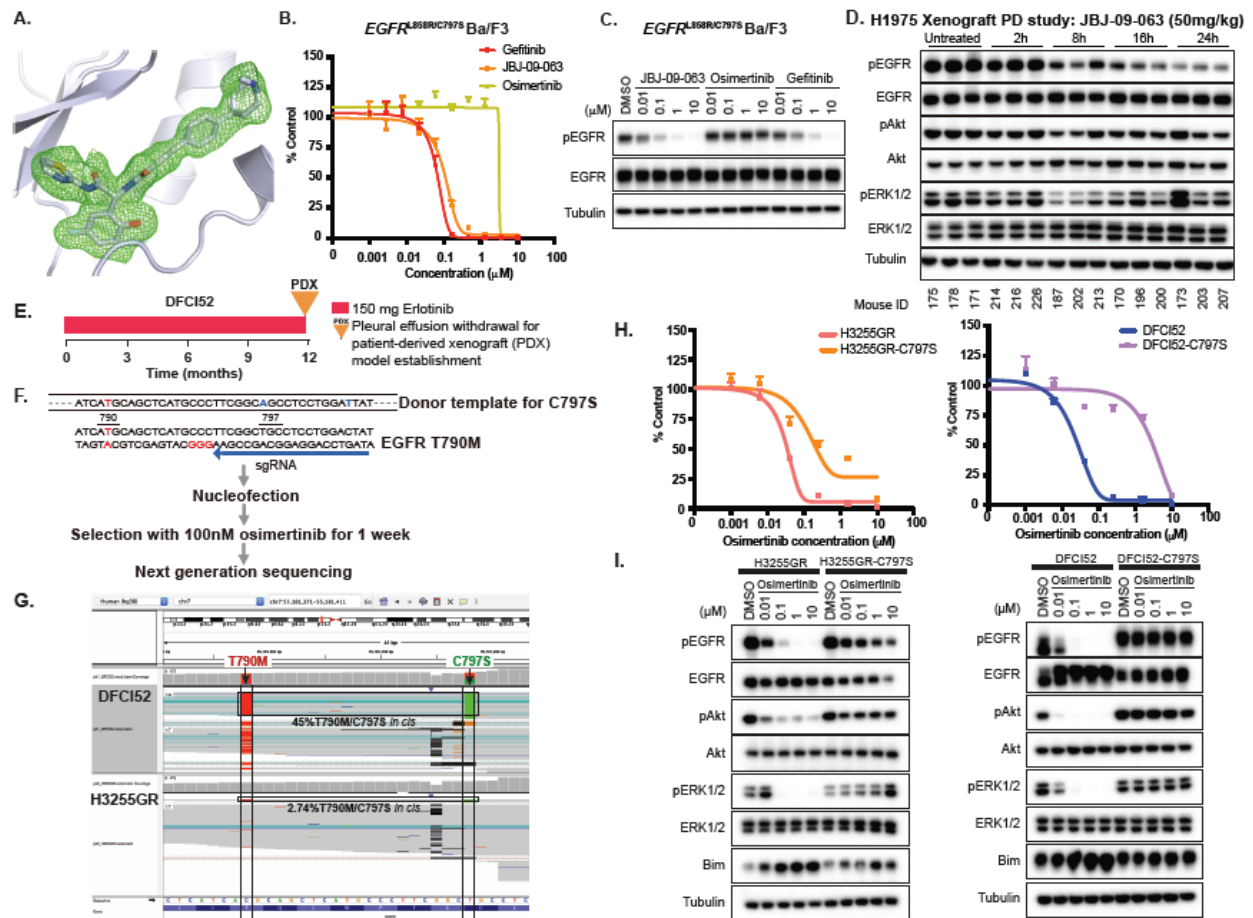

1

2 **Figure S1. Structure, potency, pharmacodynamic studies of JBJ-09-063 and the**  
 3 **development and validation of H3255GR-C797S and DFIC52-C797S models *in vitro*.**

4 (A) Positive  $F_0-F_c$  electron density at 3 sigma for JBJ-09-063. (B) Cell viability assay and (C)  
 5 Western Blot analyses of  $EGFR^{L858R/C797S}$  Ba/F3 cells treated with increasing concentrations of  
 6 JBJ-09-063, osimertinib and gefitinib. (D) Pharmacodynamic study of JBJ-09-063 in lung tumor  
 7 tissues of H1975 xenograft mice dosed with 50 mg/kg of the compound. Samples were  
 8 harvested at 0 or 2, 8, 16 and 24h after dosing and samples were processed for Western Blotting  
 9 analyses. (E) Treatment history of patient who was given the first-generation tyrosine kinase  
 10 inhibitor, erlotinib (pink bar). Pleural effusion was subsequently drawn (orange arrow with  
 11 PDX) to establish patient-derived xenograft (PDX) model. DFIC52 cell line was derived from

12 PDX tumors (mouse #135 derived from the effusion). **(F)** Workflow of  $EGFR^{L858R/T790M/C797S}$   
13 cell line generation: H3255GR and DFCI52 cells, which already harbor the  $EGFR^{L858R/T790M}$   
14 mutation, were transfected by nucleofection with a sgRNA designed to incorporate the C797S  
15 mutation *in cis* with  $EGFR^{T790M}$ . 100 nM osimertinib was used for selection for 1 week and  
16 samples were sent for next generation sequencing to determine the presence and frequency of  
17 C797S mutation. **(G)** Visualization of the presence and frequency of T790M and C797S allele  
18 variants *in cis* in H3255GR-C797S and DFCI52-C797S cells using Integrated Genome Viewer  
19 (IGV). **(H)** Cell viability assay and **(I)** Western Blot analyses of H3255GR vs. H3255GR-C797S  
20 and DFCI52 vs. DFCI52-C797S cells treated with increasing concentrations of osimertinib. Data  
21 shown is a representative experiment that was repeated at least three times. Cell viability was  
22 graphed as a percentage relative to DMSO control.

23

24

25

26

27

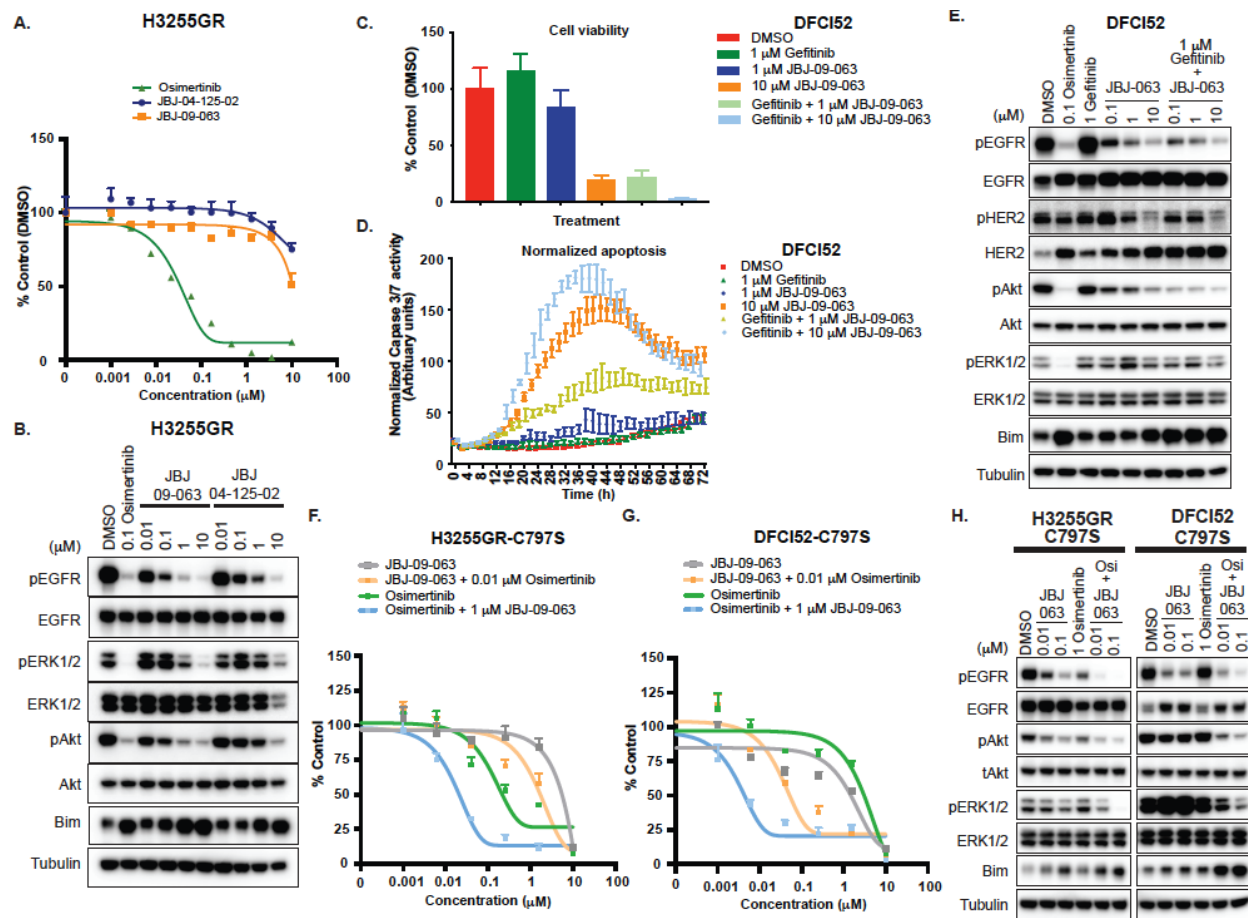

28

29 **Figure S2. JBJ-09-063 efficacy is reduced *in vitro* unless combined with gefitinib in**  
 30 **H3255GR and DFCI52 cells or with osimertinib in H3255GR-C797S and DFCI52-C797S**  
 31 **cells.**

32 (A) Cell viability and (B) Western blot analyses of H3255GR cells treated with indicated  
 33 concentrations of osimertinib, JBJ-09-063 and JBJ-04-125-02. (C) Cell viability, (D) apoptosis  
 34 and (E) Western Blot analyses of DFCI52 cells treated with indicated concentrations of gefitinib,  
 35 JBJ-09-063 or the combination of both agents. Cell viability of H3255GR-C797S (F) and  
 36 DFCI52-C797S (G) cells treated with indicated concentrations of JBJ-09-063 and osimertinib as  
 37 a single agent or in combination of both compounds. (H) Western Blot analyses of H3255GR-  
 38 C797S and DFCI52-C797S cells treated with indicated concentrations of JBJ-09-063 and  
 39 osimertinib as a single agent or in combination of both compounds. All cell viability assays were

40 graphed as a percentage of activity relative to DMSO control over indicated concentrations and  
41 all apoptosis experiments were graphed as normalized caspase 3/7 activity (in arbitrary units)  
42 over time. All studies shown here are representative experiments that were repeated at least three  
43 times.

44

45

46

47

48

49

50

51

52

53

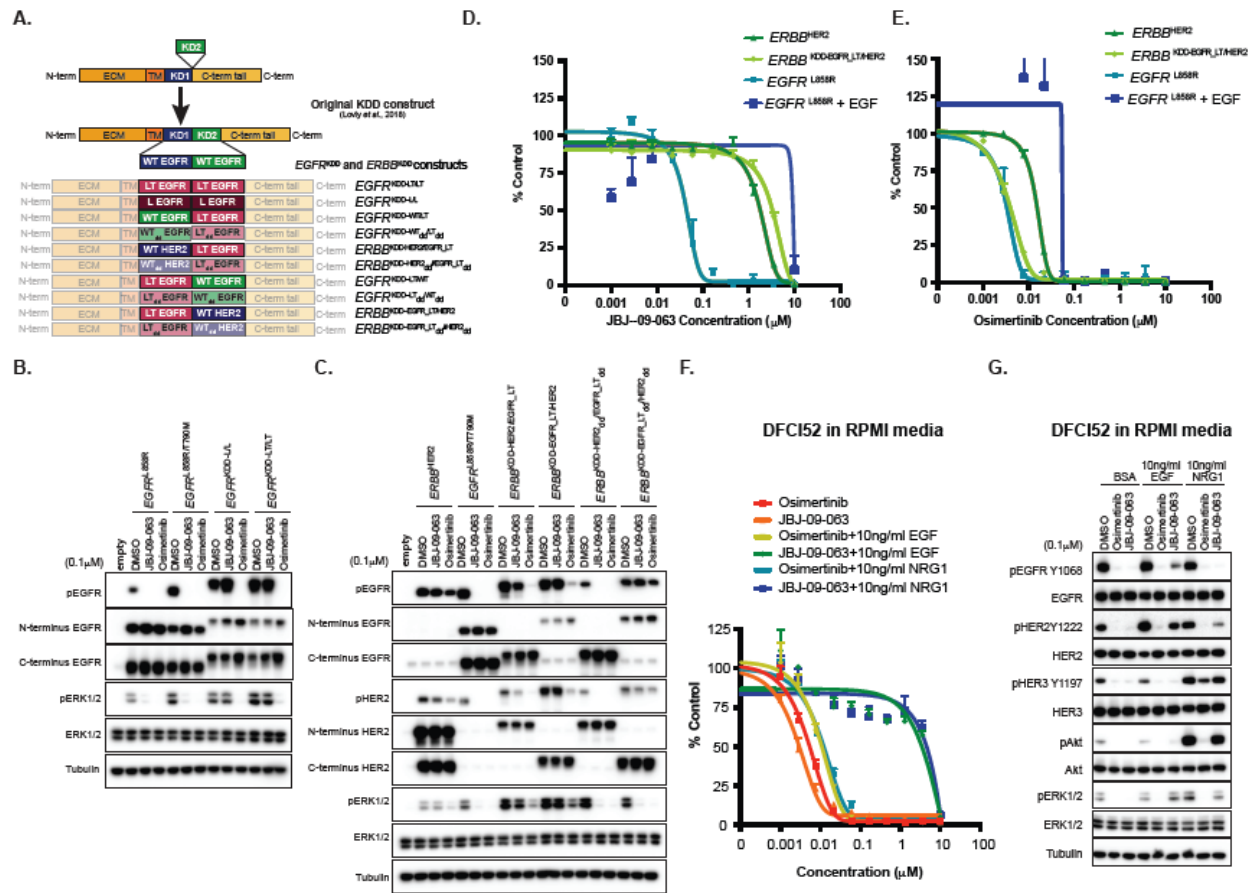

54

55

56 **Figure S3. Forced or ligand induced dimerization can impart resistance to JBJ-09-063.**

57 **(A)** Schematic representation of the original KDD construct which involves the insertion of a

58 second kinase domain (KD2) after the first kinase domain (KD1) to generate a kinase domain

59 duplication (KDD) mutation that induces intramolecular dimerization. Different combination of

60  $EGFR^{WT}$ ,  $EGFR^{L858R}$ ,  $EGFR^{L858R/T790M}$ ,  $HER2^{WT}$  kinase domains were assembled as KD1 and

61 KD2 to make the  $EGFR^{KDD}$  and  $ERBB^{KDD}$  constructs. EGFR and ERBB dimerization-deficient

62 mutants were generated as controls. N-term = amino-terminus, ECM = extracellular membrane

63 domain, TM = transmembrane domain. C-term tail = carboxyl-terminus tail. Western Blot

64 analyses of HEK293T/C1.17 cells transiently transfected with **(B)**  $EGFR^{L858R}$ ,  $EGFR^{L858R/T790M}$ ,

65  $EGFR^{KDD}$  constructs or **(C)**  $ERBB^{HER2}$ ,  $EGFR^{L858R/T790M}$  or  $ERBB^{KDD}$  constructs and treated with

66 DMSO, osimertinib or JBJ-09-063. Cell viability of Ba/F3 cells stably infected with either  
67 *ERBB<sup>HER2</sup>*, *ERBB<sup>KDD-EGFR\_LT/HER2</sup>* or *EGFR<sup>L858R</sup>* in the presence or absence of EGF treated with  
68 increasing concentrations of **(D)** JBJ-09-063 or **(E)** osimertinib and analyzed using Cell Titer  
69 Glo reagents. **(F)** Cell viability and **(G)** Western Blot analyses of DFCI52 cells cultured in RPMI  
70 media and treated with indicated concentrations of compounds in the presence or absence of  
71 EGF or NRG1. All data shown is a representative experiment that was repeated at least three  
72 times. Cell proliferation was graphed as a percentage relative to DMSO control.

73

74

75

76

77

78

79

80

81

82

83

84

85

86

87

88

89

90

91

92

93

94

95

96

97

98

99

100

101

102

103

104

105

106

A.

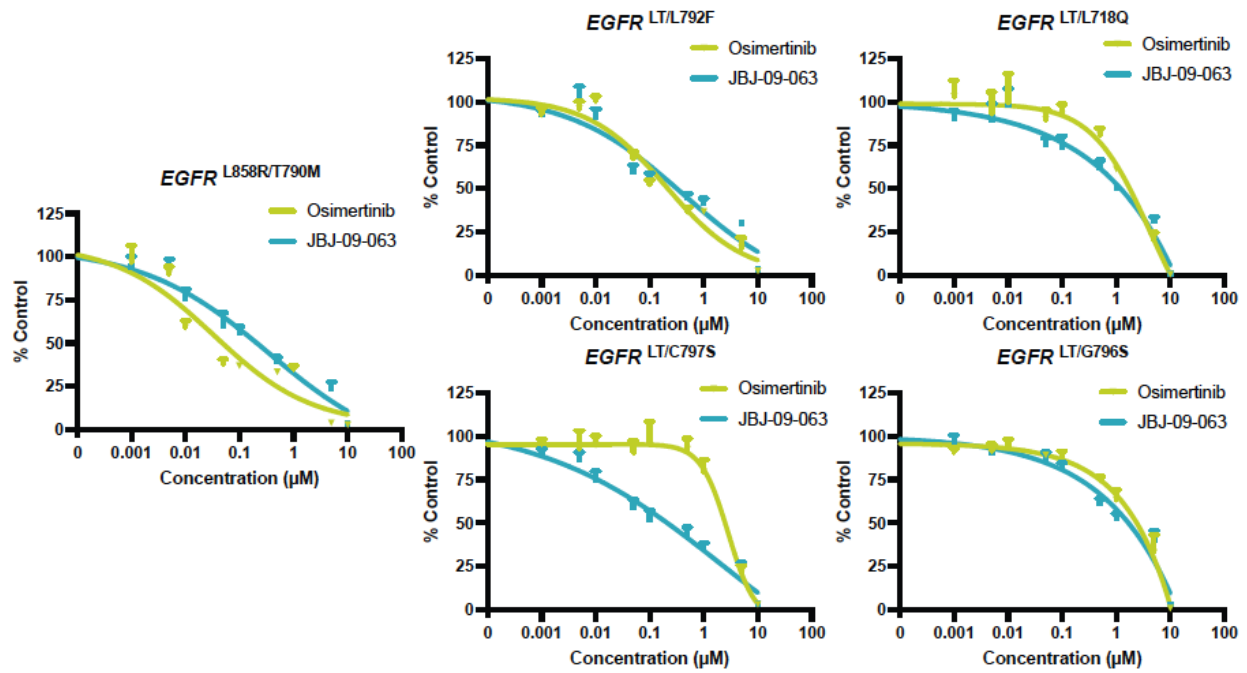

B.

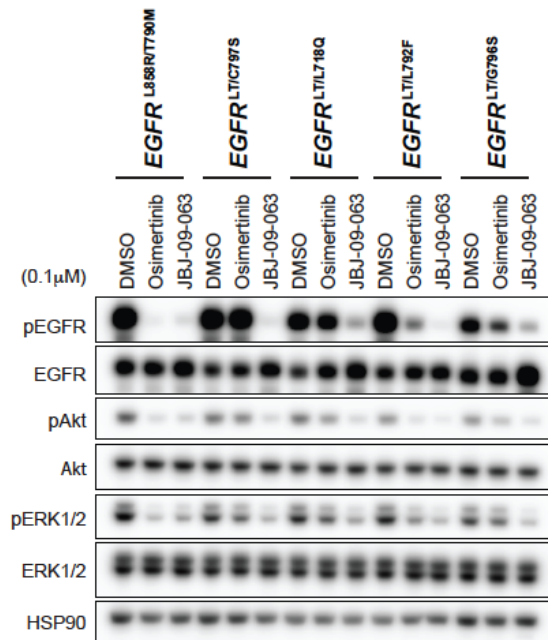

C.

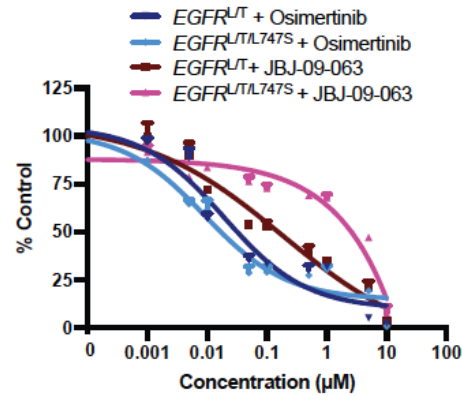

D.

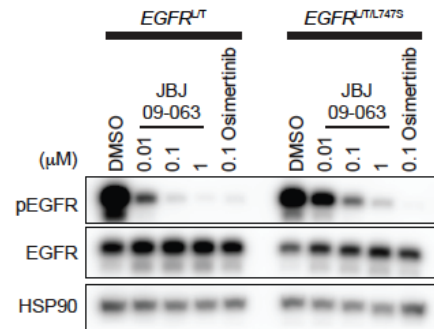

107  
 108 **Figure S4. JBJ-09-063 is effective in H1775 cells exogenously expressing the osimertinib**  
 109 **resistant mutations while osimertinib is effective in H1775 cells exogenously expressing the**  
 110 **JBJ-09-063 mutation, L747S.**

111 **(A)** Cell proliferation and **(B)** Western Blot analyses of  $EGFR^{L858R/T790M}$ ,  $EGFR^{LT/C797S}$ ,  
112  $EGFR^{LT/L718Q}$ ,  $EGFR^{LT/L792F}$ , and  $EGFR^{LT/G796S}$  H1975 cells treated with DMSO, osimertinib or  
113 JBJ-09-063. **(C)** Cell growth inhibition and **(D)** EGFR phosphorylation activity of  
114  $EGFR^{L858R/T790M}$  or  $EGFR^{LT/L747S}$  H1975 cells treated with JBJ-09-063 or osimertinib was  
115 measured by Cell Titer Glo assay and analyzed by Western Blot. Data shown is a representative  
116 experiment that was repeated at least three times. Cell viability was graphed as a percentage  
117 relative to DMSO control. LT=L858R/T790M.

118



**Table S1. Crystallographic data collection and refinement statistics**

| <b>EGFR<sup>T790M/V948R</sup> AMP-PNP and JBJ-09-063</b> |                               |
|----------------------------------------------------------|-------------------------------|
| PDB Accession                                            | 7JXQ                          |
| Resolution range                                         | 56.66 - 1.83<br>(1.90 - 1.83) |
| Space group                                              | P 1 2 <sub>1</sub> 1          |
| Unit cell                                                | 57.3 74.6 150.6 90<br>98.7 90 |
| Total reflections                                        | 771509 (78463)                |
| Unique reflections                                       | 110113 (10972)                |
| Multiplicity                                             | 7.0 (7.2)                     |
| Completeness (%)                                         | 99.31 (99.38)                 |
| Mean I/sigma(I)                                          | 9.26 (1.01)                   |
| Wilson B-factor                                          | 33.14                         |
| R-merge                                                  | 0.095 (1.647)                 |
| R-meas                                                   | 0.102 (1.775)                 |
| R-pim                                                    | 0.038 (0.658)                 |
| CC1/2                                                    | 0.999 (0.554)                 |
| Reflections used in refinement                           | 109988 (10943)                |
| Reflections used for R-free                              | 2005 (198)                    |
| R-work                                                   | 0.190 (0.383)                 |
| R-free                                                   | 0.223 (0.383)                 |
| Number of non-hydrogen atoms                             | 10431                         |
| macromolecules                                           | 9602                          |
| ligands                                                  | 288                           |
| solvent                                                  | 541                           |
| Protein residues                                         | 1189                          |
| RMS(bonds)                                               | 0.008                         |
| RMS(angles)                                              | 1.01                          |
| Ramachandran favored (%)                                 | 98.12                         |
| Ramachandran allowed (%)                                 | 1.88                          |
| Ramachandran outliers (%)                                | 0.00                          |
| Rotamer outliers (%)                                     | 2.16                          |
| Clashscore                                               | 3.44                          |
| Average B-factor                                         | 45.23                         |
| macromolecules                                           | 45.50                         |
| ligands                                                  | 35.90                         |
| solvent                                                  | 45.39                         |

119  
120  
121  
122  
123  
124  
125  
126  
127  
128  
129

Table S2. IC<sub>50</sub> of JBJ-04-125-02 and JBJ-09-063 in enzymatic assays, Ba/F3 cells, H1975 cells, and human cancer cells

| <b>Enzymes</b>         |                    |                 |                  |
|------------------------|--------------------|-----------------|------------------|
| Variant                | JBJ-04-125-02 (nM) | JBJ-09-063 (nM) | Osimertinib (nM) |
| EGFR L858R             | 0.767              | 0.147           | 1.05             |
| EGFR L858R/T790M       | 0.317              | 0.063           | 0.440            |
| EGFR L858R/T790M/C797S | 0.32               | 0.083           | >1000            |
| EGFRLT/L747S           | 1.188              | 0.396           | 0.683            |

  

| <b>Ba/F3 cells overexpressing EGFR mutants</b> |                    |                 |                  |                |                      |                        |
|------------------------------------------------|--------------------|-----------------|------------------|----------------|----------------------|------------------------|
| Cell line                                      | JBJ-04-125-02 (μM) | JBJ-09-063 (μM) | Osimertinib (μM) | Gefitinib (μM) | JBJ-0-063 + EGF (μM) | Osimertinib + EGF (μM) |
| EGFR <sup>WT</sup>                             | -                  | 3.541           | 0.101            | -              | -                    | -                      |
| EGFR <sup>L858R</sup>                          | 1.040              | 0.051           | 0.003            | 0.014          | 6.367                | 0.039                  |
| EGFR <sup>L858R/T790M</sup>                    | 0.610              | 0.050           | 0.010            | >9.3           | 2.649                | 0.022                  |
| EGFR <sup>L858R/T790M/C797S</sup>              | 0.050              | 0.010           | 1.540            | >6.9           | -                    | -                      |
| EGFR <sup>KDD-LT/WT</sup>                      | -                  | 1.972           | 0.005            | -              | -                    | -                      |
| EGFR <sup>LT/L747S</sup>                       | -                  | 0.126           | 0.003            | -              | -                    | -                      |
| ERBB <sup>KDD-EGFR_LT/HER2</sup>               | -                  | 3.376           | 0.004            | -              | -                    | -                      |
| ERBB <sup>HER2</sup>                           | -                  | 2.172           | 0.015            | -              | -                    | -                      |
| EGFR <sup>LT/L718Q</sup>                       | -                  | 0.032           | 0.403            | -              | -                    | -                      |
| EGFR <sup>LT/L792F</sup>                       | -                  | 0.005           | 0.014            | -              | -                    | -                      |
| EGFR <sup>LT/G796S</sup>                       | -                  | 0.090           | 0.392            | -              | -                    | -                      |

  

| <b>H1975 cells overexpressing EGFR mutants</b> |                 |                  |
|------------------------------------------------|-----------------|------------------|
| Cell line                                      | JBJ-09-063 (μM) | Osimertinib (μM) |
| EGFR <sup>L858R/T790M</sup>                    | 0.210           | 0.048            |
| EGFR <sup>L858R/T790M/C797S</sup>              | 0.212           | 2.483            |
| EGFR <sup>LT/L747S</sup>                       | 2.563           | 0.017            |
| EGFR <sup>LT/L718Q</sup>                       | 1.208           | 1.781            |
| EGFR <sup>LT/L792F</sup>                       | 0.318           | 0.217            |
| EGFR <sup>LT/G796S</sup>                       | 1.687           | 2.399            |

  

| <b>Human cancer cells</b> |                    |                 |                  |                |                               |                                |                                |                                 |               |                                   |                                      |
|---------------------------|--------------------|-----------------|------------------|----------------|-------------------------------|--------------------------------|--------------------------------|---------------------------------|---------------|-----------------------------------|--------------------------------------|
| Cell line                 | JBJ-04-125-02 (μM) | JBJ-09-063 (μM) | Osimertinib (μM) | Gefitinib (μM) | JBJ-09-063 + 10ng/ml EGF (μM) | Osimertinib + 10ng/ml EGF (μM) | JBJ-09-063 + 10ng/ml NRG1 (μM) | Osimertinib + 10ng/ml NRG1 (μM) | Afatinib (μM) | Osimertinib + 1μM JBJ-09-063 (μM) | JBJ-09-063 + 0.01μM Osimertinib (μM) |
| A431                      | -                  | 3.645           | -                | 0.209          | -                             | -                              | -                              | -                               | 0.069         | -                                 | -                                    |
| H3255 (R10)               | -                  | 0.009           | 0.003            | 0.001          | -                             | -                              | -                              | -                               | -             | -                                 | -                                    |
| H3255GR                   | -                  | 5.995           | 0.026            | -              | -                             | -                              | -                              | -                               | -             | 0.123                             | 6.691                                |
| H3255GR (R10)             | -                  | 0.005           | 0.003            | -              | 4.486                         | 0.047                          | 5.514                          | 0.01                            | -             | -                                 | -                                    |
| H3255GR-C797S             | -                  | 5.1             | 0.213            | -              | -                             | -                              | -                              | -                               | -             | 0.025                             | 2.023                                |
| DFCI52                    | 7.981              | 2.295           | 0.024            | >9.6           | -                             | -                              | -                              | -                               | -             | 0.019                             | 1.29                                 |
| DFCI52 (R10)              | -                  | 0.003           | 0.005            | -              | 2.988                         | 0.009                          | 3.525                          | 0.009                           | -             | -                                 | -                                    |

130  
131

132  
133  
134  
135  
136  
137  
138

**Table S3. Pharmacokinetic profile of JBJ-09-063**

| Drug       | Route | Dose (mg/kg) | T <sub>1/2</sub> (hr) | T <sub>max</sub> (hr) | C <sub>max</sub> (ng/ml) | C <sub>max</sub> (μM) | AUC <sub>inf</sub> (min <sup>2</sup> ng/mL) | AUC <sub>inf</sub> (μM.hr) | AUCINF_obs (min <sup>2</sup> ng/mL) | AUC (%Extrap) | CL_obs (mL/min/kg) | MRT <sub>inf,obs</sub> (hr) | V <sub>ss</sub> obs (L/kg) | F (%) |
|------------|-------|--------------|-----------------------|-----------------------|--------------------------|-----------------------|---------------------------------------------|----------------------------|-------------------------------------|---------------|--------------------|-----------------------------|----------------------------|-------|
| JBJ-09-063 | IV    | 3            | 2.28                  | 0.08                  | 3397                     | 6.11                  | 147478                                      | 4.42                       | 191945                              | 23.03         | 15.74              | 2.52                        | 2.37                       |       |
|            | PO    | 20           |                       | 6.67                  | 647                      | 1.16                  | 143880                                      | 4.31                       |                                     |               |                    |                             |                            | 14.63 |

139  
140

**Table S4. Reagents and Antibodies**

| Reagents                                                                                            | Source/Company                   | Catalog Number |
|-----------------------------------------------------------------------------------------------------|----------------------------------|----------------|
| <b>Antibodies</b>                                                                                   |                                  |                |
| Phospho-EGF Receptor (Tyr1068) (D7A5) XP rabbit antibody                                            | Cell Signaling Technology        | Cat#3777       |
| EGF Receptor (D38B1) XP rabbit antibody                                                             | Cell Signaling Technology        | Cat#4267S      |
| Phospho-AKT (SER473) (D9E) XP rabbit antibody                                                       | Cell Signaling Technology        | Cat#4060L      |
| AKT antibody                                                                                        | Cell Signaling Technology        | Cat#9272L      |
| Phospho-p44/42 MAPK (Erk1/2) (Thr202/Tyr204) (D13.14.4E) XP rabbit antibody                         | Cell Signaling Technology        | Cat#4370L      |
| p44/42 MAPK (Erk1/2) (137F5) rabbit antibody                                                        | Cell Signaling Technology        | Cat#4695S      |
| Monoclonal Anti- $\alpha$ -Tubulin antibody                                                         | Sigma Aldrich                    | Cat#T5168-.5ML |
| Phospho-EGFR (Tyr998) (C24A5) rabbit antibody                                                       | Cell Signaling Technology        | Cat#2641S      |
| EGF Receptor (N-terminal) rabbit antibody                                                           | Abgent                           | AP19833a       |
| Phospho-HER2 (Tyr877) rabbit antibody                                                               | Cell Signaling Technology        | Cat#2241S      |
| c- <i>erbB</i> -2/HER-2/ <i>neu</i> (Phospho-specific) Ab-18 (Clone PN2A) mouse monoclonal antibody | Thermo Scientific                | Cat#MS-1072-P0 |
| HER2 (29D8) rabbit antibody                                                                         | Cell Signaling Technology        | Cat#2165S      |
| HER2 (D8F12) XP rabbit antibody                                                                     | Cell Signaling Technology        | Cat#4290S      |
| Bim (C34C5) rabbit antibody                                                                         | Cell Signaling Technology        | Cat#2933       |
| Phospho-HER3 (Tyr1197) (C56E4) rabbit antibody                                                      | Cell Signaling Technology        | Cat#4561S      |
| HER3 (D22C5) XP rabbit antibody                                                                     | Cell Signaling Technology        | Cat#12708S     |
| HSP90 $\alpha/\beta$ rabbit antibody                                                                | Santa Cruz Biotechnology         | Cat#S7947      |
| <b>Chemicals, Peptides, and Recombinant Proteins</b>                                                |                                  |                |
| EGF Recombinant Human Protein Solution                                                              | Thermo Fisher Scientific         | PHG0311L       |
| Mouse Recombinant Interleukin-3                                                                     | Prospec                          | CYT-371        |
| JB1-04-125-02                                                                                       | To and Jang <i>et al.</i> , 2019 |                |
| Osimertinib                                                                                         | Medchem Express                  | HY-15772       |
| Afatinib (BIBW2992)                                                                                 | Selleck Chemicals                | S1011          |
| N-ethyl-N-nitrosourea (ENU)                                                                         | Sigma Aldrich                    | N3385-1G       |
| NMP                                                                                                 | Sigma Aldrich                    | 494496         |
| PEG-300                                                                                             | Sigma Aldrich                    | 90878          |
| HPMC                                                                                                | Sigma Aldrich                    | 09963          |
| Fugene® HD Transfection Reagent                                                                     | Promega                          | E2311          |
| Gefitinib                                                                                           | Selleck Chemicals                | S1025          |
| Nrg1 human recombinant protein                                                                      | Abcam                            | ab50227        |
| <b>Commercial Assays</b>                                                                            |                                  |                |
| Cell Titer 96 Aqueous Non-Radioactive Cell Proliferation Assay                                      | Promega                          | G1111          |
| CellEvent™ Caspase-3/7 Green ReadyProbes® Reagents                                                  | Thermo Fisher Scientific         | R37111         |
| Duolink® Proximity Ligation Assay                                                                   | Sigma Aldrich                    | DUO92101       |
| Duolink® in situ PLA probe Anti-Rabbit Minus                                                        | Sigma Aldrich                    | DUO92005       |

141  
142  
143  
144

**Table S5. Sequences and primers for plasmids and cell lines generation**

**A. EGFR mutant plasmids**

| Method            | Cloning                              |                            | Primer Sequences                                                                            |
|-------------------|--------------------------------------|----------------------------|---------------------------------------------------------------------------------------------|
|                   | Construct                            | Mutation/Infusion fragment |                                                                                             |
| Mutagenesis       |                                      | EGFR L858R/T790M           | 5'-ATCATGCAGCTCATGCC-3'<br>5'-GAGTTGCACGGTGGAGGTG-3'                                        |
| Mutagenesis       |                                      | EGFR L747S                 | 5'-GAGATGTGCTTCTTGTATTCCCTTGATAGCGACGG-3'<br>5'-CCGTCGCTATCAAGGAATCAAGAGAAGCAACATCTC-3'     |
| Mutagenesis       |                                      | EGFR G796S                 | 5'-GCTCATGCCCTTCAGCTGCCTCCTGGA-3'<br>5'-TCCAGGAGGCAGCTGAAGGGCATGAGC-3'                      |
| Mutagenesis       |                                      | EGFR L792F                 | 5'-AGCCGAAGGGCATGAACTGCGTGATGAGTTG-3'<br>5'-CAACTCATCACGAGTTCATGCCCTTCGGCT-3'               |
| PCR amplification |                                      | EGFR TKD (partial)         | 5'-GGTGACTCCTTCACACATACTC-3'<br>3'-GCTTTGCAGCCCATTTCTATC-3'                                 |
| PCR amplification |                                      | JP destination vector      | 5'-GGAAGCTTCTAGACCATTTCG-3'<br>5'-GGTGTGACTGATAACTTCG-3'                                    |
| PCR amplification |                                      | pDNR mutant insert         | 5'-TTATCAGTCGACACCATGCGACCCCTCCGGGACG-3'<br>5'-GTCTAGAAAAGCTTCCCAATGCTCCAATAAATTCAGTGC-3'   |
| Mutagenesis       |                                      | EGFR L858R                 | 5'-GATTTTGGGCGGCCAAACTG-3'<br>5'-TGTGATCTTGACATGCTGC-3'                                     |
| Mutagenesis       |                                      | EGFR T790M                 | 5'-GCTCATCATGCAGCTCATGCC-3'<br>5'-TGCACGGTGGAGGTGAGGC-3'                                    |
| Mutagenesis       |                                      | EGFR I941R                 | 5'-CATATGTACCCGCGATGTCTACATGATCATGGTCAAGTGC-3'<br>5'-GGTGGCTGAGGGAGGCGT-3'                  |
| Mutagenesis       |                                      | HER2 V956R                 | 5'-CATGATCATGCGCAAATGTTGGATG-3'<br>5'-TAGACATCAATGGTGCAG-3'                                 |
| PCR amplification | EGFR <sup>X</sup> :EGFR <sup>X</sup> | N-EGFR inf.fr.             | 5'-CGGCCAATCTAGATGCGGCCGCATGCGACCCCTCCGGGACG-3'<br>5'-GCTCCACAAGCAGAGAGCTCAGGAGGGGAGTCC-3'  |
| PCR amplification |                                      | C-EGFR inf.fr.             | 5'-GAGCTCTCTGCTTGTGGAGCCTCTTACACC-3'<br>5'-CTACCCGCTTCCATTGCTCAGCGGTGCTGTCCATCTGCACGA-3'    |
| PCR amplification | EGFR <sup>X</sup> :HER2 <sup>X</sup> | N-EGFR inf.fr.             | 5'-CGGCCAATCTAGATGCGGCCGCATGCGACCCCTCCGGGACG-3'<br>5'-GCTCCACCAGCAGAGAGCTCAGGAGGGGAGTCC-3'  |
| PCR amplification |                                      | C-HER2 inf.fr.             | 5'-GAGCTCTCTGCTGGTGGAGCCGCTGACAC-3'<br>5'-AAGCTGGGTCTCACACTGGCAGTCCAGAC-3'                  |
| PCR amplification |                                      | Inf.fr. X                  | 5'-GCCAGTGTGAGACCCAGCTTTCTTGTACAAGTAC-3'<br>5'-CTACCCGCTTCCATTGCTCAGCGGTGCTGTCCATCTGCACG-3' |
| PCR amplification | HER2 <sup>X</sup> :EGFR <sup>X</sup> | N-HER2 inf.fr.             | 5'-CGGCCAATCTAGATGCGGCCGCATGGAGCTGGCGGCCTTGTGC-3'<br>5'-GCTCCACAAGCCTGTGGTGGACCATGCC-3'     |
| PCR amplification |                                      | C-EGFR inf.fr.             | 5'-CCACCACAGGCTTGTGGAGCCTTACACC-3'<br>5'-CTACCCGCTTCCATTGCTCAGCGGTGCTGTCCATCTGCACGA-3'      |

\*X stands for WT or any introduced mutation(s)

145

**B. C797S CRISPR cell lines**

| Oligo                      | Primer sequences                                                                                      |
|----------------------------|-------------------------------------------------------------------------------------------------------|
| sgRNA EGFR exon 20         | TAGTCCAGGAGGCAGCCGAA                                                                                  |
| Donor template T790M-C797S | TCTGCCTCACCTCCACCGTGCAGCTCATCACGAGCTCATGCCCTTCGGCAGCC<br>TCCTGGATTATGTCGGGAACACAAAGACAATATTGGTCCCAGTA |
| CRISPR sequencing primers  | 5'-GGGCATCTGCCTCACCTC<br>3'-GCAGACCGCATGTGAGGAT                                                       |

146
